# Supplementary material for: Antarctic Krill Are Reservoirs for Distinct Southern Ocean Microbial Communities
Source: Front Microbiol. 2019 Jan 15;9:3226. doi: 10.3389/fmicb.2018.03226 (PMC6340936; doi:10.3389/fmicb.2018.03226)
Supplement: Supplementary file 2 [file Data_Sheet_1.CSV]

#SampleID	BarcodeSequence	LinkerPrimerSequence	Trawl	DecLat	DecLong	Trawl_min_depth	Trawl_max_depth	Tissue	Sex	Growth_stage	DNA_conc	Description
EB1			EB1	NA	NA	NA	NA	Blank	NA	NA	0	EB1
EB2			EB2	NA	NA	NA	NA	Blank	NA	NA	0	EB2
T11034DG002			KXT11	-64.26601667	83.8392	15	25	Dig_gland	F	Adult	0.18	T11-034-DG-002
T11035DG006			KXT11	-64.26601667	83.8392	15	25	Dig_gland	F	Adult	1.16	T11-035-DG-006
T11036DG009			KXT11	-64.26601667	83.8392	15	25	Dig_gland	M	Adult	1.65	T11-036-DG-009
T11037DG013			KXT11	-64.26601667	83.8392	15	25	Dig_gland	F	Adult	2.15	T11-037-DG-013
T11038DG016			KXT11	-64.26601667	83.8392	15	25	Dig_gland	F	Adult	0.22	T11-038-DG-016
T11039DG020			KXT11	-64.26601667	83.8392	15	25	Dig_gland	M	Adult	0.65	T11-039-DG-020
T11035F005			KXT11	-64.26601667	83.8392	15	25	Faeces	F	Adult	0.12	T11-035-F-005
T11037F012			KXT11	-64.26601667	83.8392	15	25	Faeces	F	Adult	0.61	T11-037-F-012
T11039F019			KXT11	-64.26601667	83.8392	15	25	Faeces	M	Adult	0.74	T11-039-F-019
T11034M001			KXT11	-64.26601667	83.8392	15	25	Moult	F	Adult	1.45	T11-034-M-001
T11035M004			KXT11	-64.26601667	83.8392	15	25	Moult	F	Adult	1.01	T11-035-M-004
T11036M008			KXT11	-64.26601667	83.8392	15	25	Moult	M	Adult	1.89	T11-036-M-008
T11037M011			KXT11	-64.26601667	83.8392	15	25	Moult	F	Adult	2.23	T11-037-M-011
T11038M015			KXT11	-64.26601667	83.8392	15	25	Moult	F	Adult	0.89	T11-038-M-015
T11039M018			KXT11	-64.26601667	83.8392	15	25	Moult	M	Adult	1.83	T11-039-M-018
T11SW022			KXT11	-64.26601667	83.8392	15	25	Sea_water	NA	NA	14.47	T11-SW-022
T11034S002			KXT11	-64.26601667	83.8392	15	25	Stomach	F	Adult	32.83	T11-034-S-002
T11035S006			KXT11	-64.26601667	83.8392	15	25	Stomach	F	Adult	17.46	T11-035-S-006
T11036S009			KXT11	-64.26601667	83.8392	15	25	Stomach	M	Adult	27.13	T11-036-S-009
T11038S016			KXT11	-64.26601667	83.8392	15	25	Stomach	F	Adult	4.08	T11-038-S-016
T11039S020			KXT11	-64.26601667	83.8392	15	25	Stomach	M	Adult	8.33	T11-039-S-020
T16074DG025			KXT16	-63.98671667	89.12368333	10	25	Dig_gland	J	Juvenile	1.41	T16-074-DG-025
T16075DG030			KXT16	-63.98671667	89.12368333	10	25	Dig_gland	J	Juvenile	12.35	T16-075-DG-030
T16079DG048			KXT16	-63.98671667	89.12368333	10	25	Dig_gland	J	Juvenile	1.73	T16-079-DG-048
T16074F024			KXT16	-63.98671667	89.12368333	10	25	Faeces	J	Juvenile	0.16	T16-074-F-024
T16075F029			KXT16	-63.98671667	89.12368333	10	25	Faeces	J	Juvenile	0.14	T16-075-F-029
T16076F034			KXT16	-63.98671667	89.12368333	10	25	Faeces	M	Sub-adult	0.02	T16-076-F-034
T16077F039			KXT16	-63.98671667	89.12368333	10	25	Faeces	J	Juvenile	0.22	T16-077-F-039
T16074JW027			KXT16	-63.98671667	89.12368333	10	25	Jar_water	J	Juvenile	0.49	T16-074-JW-027
T16075JW032			KXT16	-63.98671667	89.12368333	10	25	Jar_water	J	Juvenile	0.35	T16-075-JW-032
T16076JW037			KXT16	-63.98671667	89.12368333	10	25	Jar_water	M	Sub-adult	0.6	T16-076-JW-037
T16077JW042			KXT16	-63.98671667	89.12368333	10	25	Jar_water	J	Juvenile	0.53	T16-077-JW-042
T16078JW046			KXT16	-63.98671667	89.12368333	10	25	Jar_water	J	Juvenile	0.66	T16-078-JW-046
T16079JW050			KXT16	-63.98671667	89.12368333	10	25	Jar_water	J	Juvenile	0.49	T16-079-JW-050
T16074M023			KXT16	-63.98671667	89.12368333	10	25	Moult	J	Juvenile	0.44	T16-074-M-023
T16075M028			KXT16	-63.98671667	89.12368333	10	25	Moult	J	Juvenile	0.34	T16-075-M-028
T16076M033			KXT16	-63.98671667	89.12368333	10	25	Moult	M	Sub-adult	0.57	T16-076-M-033
T16077M038			KXT16	-63.98671667	89.12368333	10	25	Moult	J	Juvenile	0.62	T16-077-M-038
T16078M043			KXT16	-63.98671667	89.12368333	10	25	Moult	J	Juvenile	0.8	T16-078-M-043
T16079M047			KXT16	-63.98671667	89.12368333	10	25	Moult	J	Juvenile	0.55	T16-079-M-047
T16SW051			KXT16	-63.98671667	89.12368333	10	25	Sea_water	NA	NA	9.12	T16-SW-051
T16074S025			KXT16	-63.98671667	89.12368333	10	25	Stomach	J	Juvenile	34.77	T16-074-S-025
T16075S030			KXT16	-63.98671667	89.12368333	10	25	Stomach	J	Juvenile	17.34	T16-075-S-030
T16076S035			KXT16	-63.98671667	89.12368333	10	25	Stomach	M	Sub-adult	9.9	T16-076-S-035
T16077S040			KXT16	-63.98671667	89.12368333	10	25	Stomach	J	Juvenile	1.93	T16-077-S-040
T16078S044			KXT16	-63.98671667	89.12368333	10	25	Stomach	J	Juvenile	27.17	T16-078-S-044
T16079S048			KXT16	-63.98671667	89.12368333	10	25	Stomach	J	Juvenile	4.98	T16-079-S-048
T25172DG054			KXT25	-60.18	84.73166667	30	35	Dig_gland	F	Sub-adult	6.19	T25-172-DG-054
T25173DG058			KXT25	-60.18	84.73166667	30	35	Dig_gland	M	Sub-adult	0.41	T25-173-DG-058
T25174DG061			KXT25	-60.18	84.73166667	30	35	Dig_gland	F	Sub-adult	0.17	T25-174-DG-061
T25175DG065			KXT25	-60.18	84.73166667	30	35	Dig_gland	J	Juvenile	0.24	T25-175-DG-065
T25176DG068			KXT25	-60.18	84.73166667	30	35	Dig_gland	J	Juvenile	0.18	T25-176-DG-068
T25177DG072			KXT25	-60.18	84.73166667	30	35	Dig_gland	J	Juvenile	0.16	T25-177-DG-072
T25172F053			KXT25	-60.18	84.73166667	30	35	Faeces	F	Sub-adult	0	T25-172-F-053
T25173F057			KXT25	-60.18	84.73166667	30	35	Faeces	M	Sub-adult	0	T25-173-F-057
T25175F064			KXT25	-60.18	84.73166667	30	35	Faeces	J	Juvenile	0	T25-175-F-064
T25177F071			KXT25	-60.18	84.73166667	30	35	Faeces	J	Juvenile	0	T25-177-F-071
T25172M052			KXT25	-60.18	84.73166667	30	35	Moult	F	Sub-adult	0.7	T25-172-M-052
T25173M056			KXT25	-60.18	84.73166667	30	35	Moult	M	Sub-adult	0.42	T25-173-M-056
T25174M060			KXT25	-60.18	84.73166667	30	35	Moult	F	Sub-adult	0.9	T25-174-M-060
T25175M063			KXT25	-60.18	84.73166667	30	35	Moult	J	Juvenile	0.91	T25-175-M-063
T25176M067			KXT25	-60.18	84.73166667	30	35	Moult	J	Juvenile	0.58	T25-176-M-067
T25177M070			KXT25	-60.18	84.73166667	30	35	Moult	J	Juvenile	0.66	T25-177-M-070
T25SW074			KXT25	-60.18	84.73166667	30	35	Sea_water	NA	NA	54.42	T25-SW-074
T25172S054			KXT25	-60.18	84.73166667	30	35	Stomach	F	Sub-adult	8.53	T25-172-S-054
T25173S058			KXT25	-60.18	84.73166667	30	35	Stomach	M	Sub-adult	6.9	T25-173-S-058
T25174S061			KXT25	-60.18	84.73166667	30	35	Stomach	F	Sub-adult	2.12	T25-174-S-061
T25175S065			KXT25	-60.18	84.73166667	30	35	Stomach	J	Juvenile	8.97	T25-175-S-065
T25176S068			KXT25	-60.18	84.73166667	30	35	Stomach	J	Juvenile	19.48	T25-176-S-068
T25177S072			KXT25	-60.18	84.73166667	30	35	Stomach	J	Juvenile	10.76	T25-177-S-072
T39442DG077			KXT39	-66.81288333	63.72588333	65	80	Dig_gland	F	Adult	0.8	T39-442-DG-077
T39443DG081			KXT39	-66.81288333	63.72588333	65	80	Dig_gland	J	Juvenile	9.04	T39-443-DG-081
T39444DG084			KXT39	-66.81288333	63.72588333	65	80	Dig_gland	J	Juvenile	0.09	T39-444-DG-084
T39491DG088			KXT39	-66.81288333	63.72588333	65	80	Dig_gland	F	Adult	11.06	T39-491-DG-088
T39492DG092			KXT39	-66.81288333	63.72588333	65	80	Dig_gland	F	Adult	56.9	T39-492-DG-092
T39493DG096			KXT39	-66.81288333	63.72588333	65	80	Dig_gland	F	Adult	30.6	T39-493-DG-096
T39442F076			KXT39	-66.81288333	63.72588333	65	80	Faeces	F	Adult	0.02	T39-442-F-076
T39443F080			KXT39	-66.81288333	63.72588333	65	80	Faeces	J	Juvenile	0	T39-443-F-080
T39491F087			KXT39	-66.81288333	63.72588333	65	80	Faeces	F	Adult	0.01	T39-491-F-087
T39492F091			KXT39	-66.81288333	63.72588333	65	80	Faeces	F	Adult	0	T39-492-F-091
T39493F095			KXT39	-66.81288333	63.72588333	65	80	Faeces	F	Adult	0.07	T39-493-F-095
T39442M075			KXT39	-66.81288333	63.72588333	65	80	Moult	F	Adult	2.3	T39-442-M-075
T39443M079			KXT39	-66.81288333	63.72588333	65	80	Moult	J	Juvenile	0.45	T39-443-M-079
T39444M083			KXT39	-66.81288333	63.72588333	65	80	Moult	J	Juvenile	0.28	T39-444-M-083
T39491M086			KXT39	-66.81288333	63.72588333	65	80	Moult	F	Adult	2.9	T39-491-M-086
T39492M090			KXT39	-66.81288333	63.72588333	65	80	Moult	F	Adult	1.7	T39-492-M-090
T39493M094			KXT39	-66.81288333	63.72588333	65	80	Moult	F	Adult	1.6	T39-493-M-094
T39442S077			KXT39	-66.81288333	63.72588333	65	80	Stomach	F	Adult	32.89	T39-442-S-077
T39443S081			KXT39	-66.81288333	63.72588333	65	80	Stomach	J	Juvenile	5.34	T39-443-S-081
T39444S084			KXT39	-66.81288333	63.72588333	65	80	Stomach	J	Juvenile	4.57	T39-444-S-084
T39491S088			KXT39	-66.81288333	63.72588333	65	80	Stomach	F	Adult	23.97	T39-491-S-088
T39492S092			KXT39	-66.81288333	63.72588333	65	80	Stomach	F	Adult	0.13	T39-492-S-092
T39493S096			KXT39	-66.81288333	63.72588333	65	80	Stomach	F	Adult	5.17	T39-493-S-096
